# Supplementary material
Source: publisher figshare collection journal article supplement (https://diabetesjournals.figshare.com/articles/dataset/_/18019943)

Supplementary Figure 1.

Uninfected

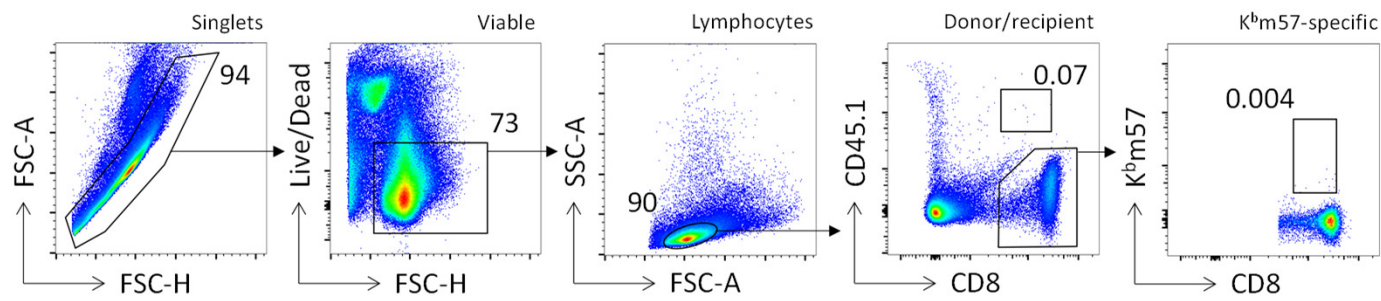

Infected

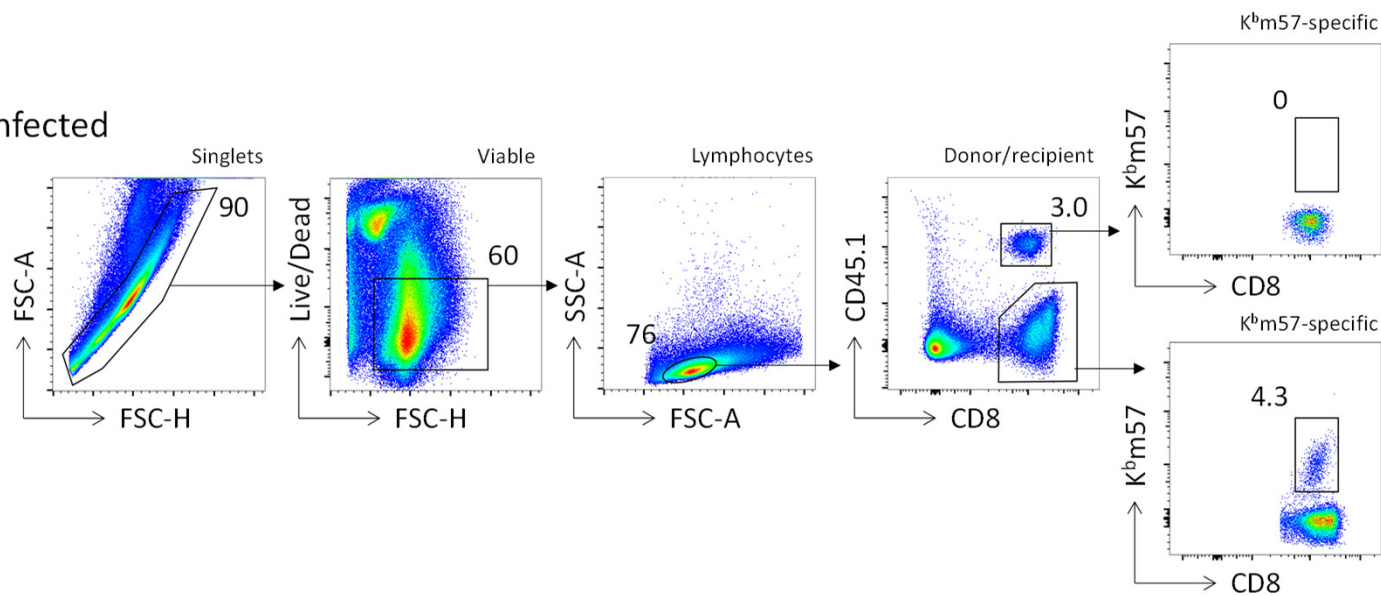

Supplement: Supplementary file 1 [file 1]

Supplementary Figure 2.

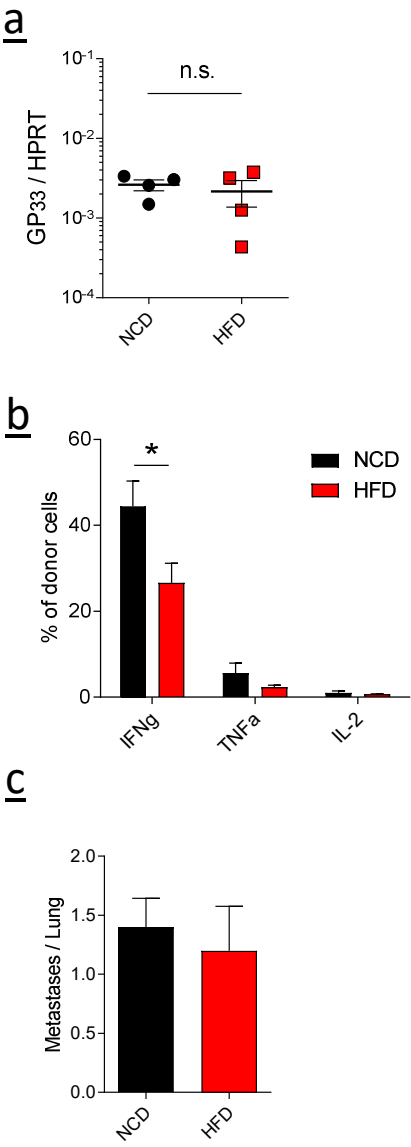

Supplement: Supplementary file 2 [file 1]

Supplementary Figure 3.

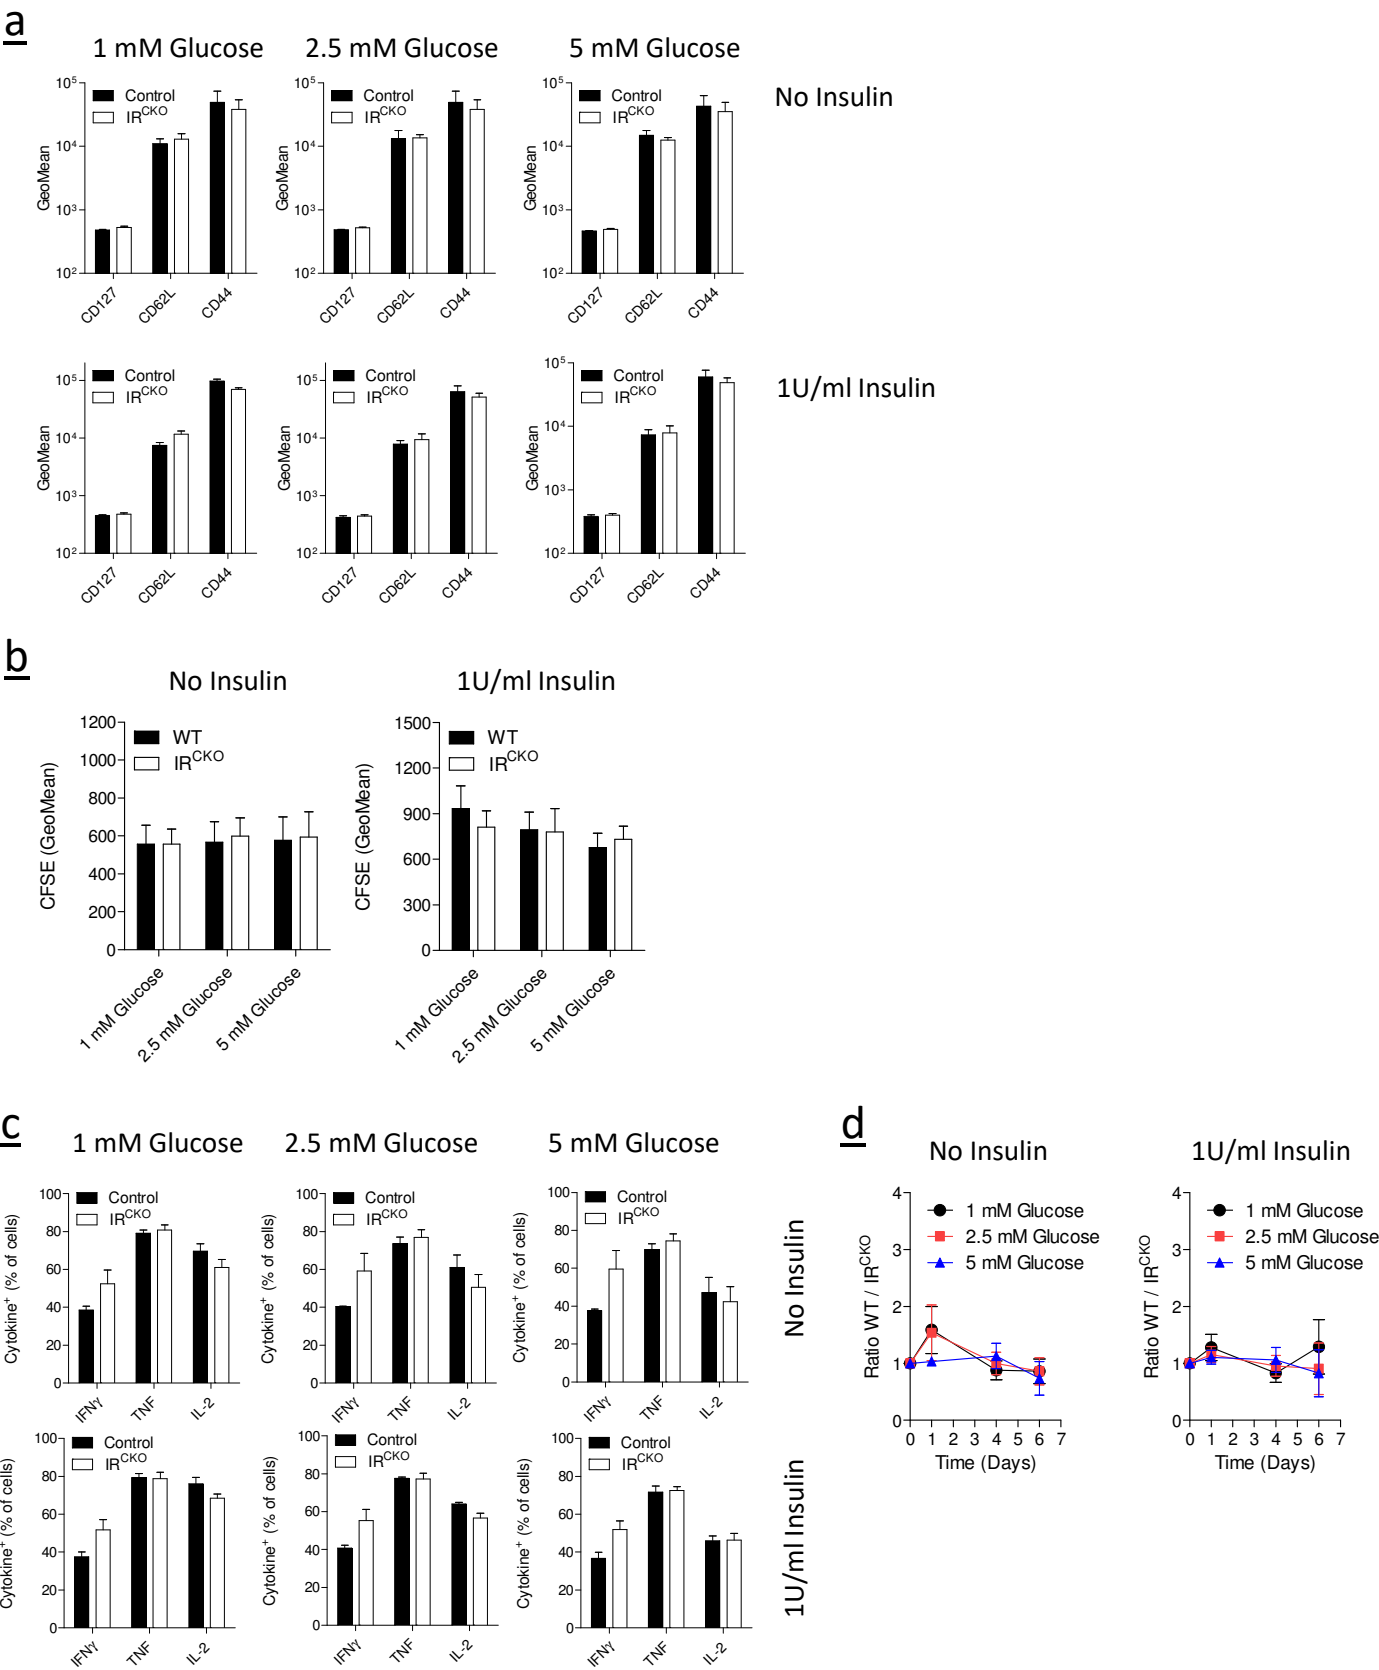

Supplement: Supplementary file 3 [file 1]

Supplementary Figure 4.

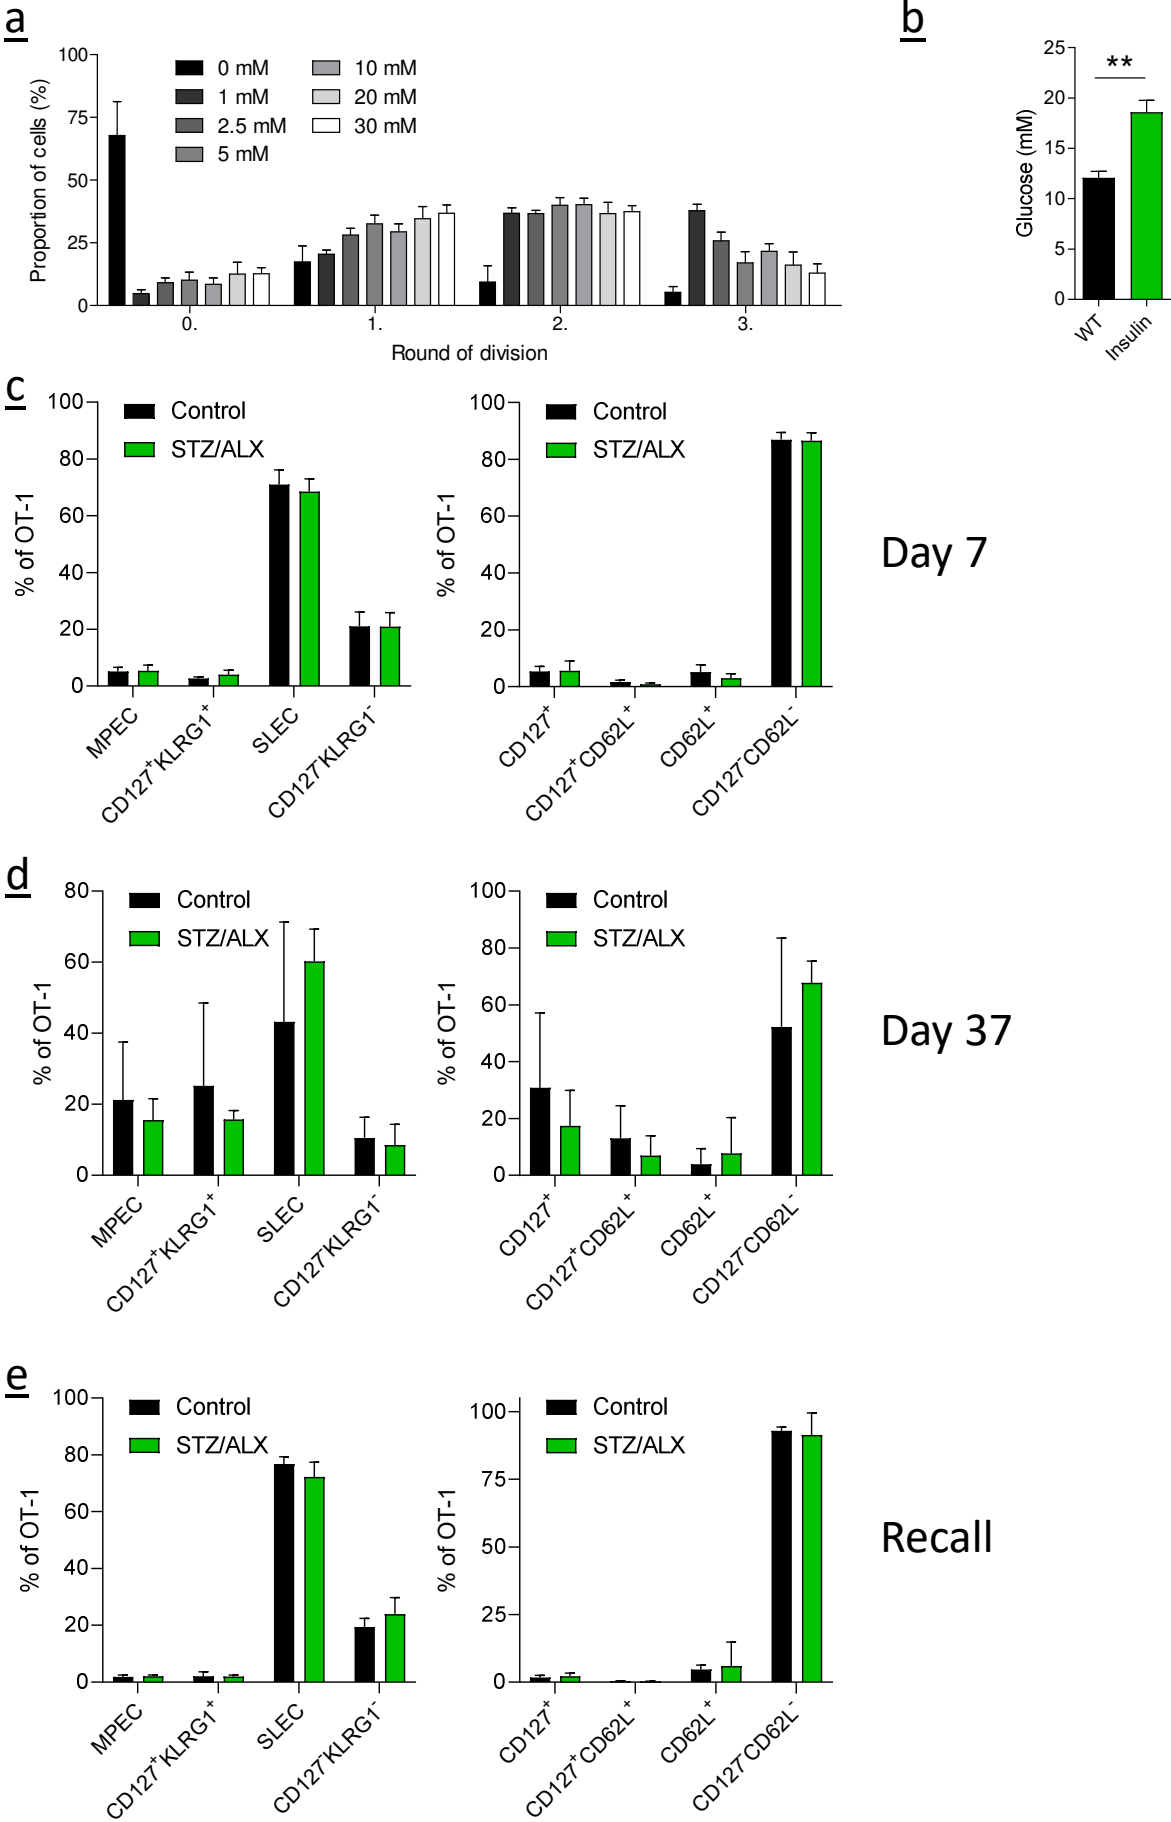

Supplement: Supplementary file 4 [file 1]
